# Supplementary material
Source: publisher site journal article supplement (https://italianbotanist.pensoft.net/article/46426/download/suppl/33/)
Supplement: Supplementary file 1

Table 1S. A. Multifactor three-way ANOVA results to test the presence of significant differences in shoot density among samples collected at different depth, location and substrate typology.

| <b>Three-way ANOVA – Shoot density (n° shoot/m<sup>2</sup>)</b> |                |             |                 |          |                   |
|-----------------------------------------------------------------|----------------|-------------|-----------------|----------|-------------------|
|                                                                 | <b>Sum Sq.</b> | <b>d.f.</b> | <b>Mean Sq.</b> | <b>F</b> | <b>Prob&gt;F</b>  |
| <b>Depth</b>                                                    | 226471         | 2           | 113235.5        | 12.56    | <b>p&lt;0.001</b> |
| <b>Location</b>                                                 | 31885.8        | 2           | 15942.9         | 1.77     | 0.1868            |
| <b>Substrates</b>                                               | 76990.4        | 2           | 38495.2         | 4.27     | <b>p&lt;0.05</b>  |
| <b>Error</b>                                                    | 288410         | 32          | 9012.8          |          |                   |
| <b>Total</b>                                                    | 896383.4       | 50          |                 |          |                   |

Table 1S. B Multifactor three-way ANOVA results to test the presence of significant differences in number of leaf for shoot among samples collected at different depth, location and substrate typology.

| <b>Three-way ANOVA – Leaf number/shoot</b> |                |             |                 |          |                  |
|--------------------------------------------|----------------|-------------|-----------------|----------|------------------|
|                                            | <b>Sum Sq.</b> | <b>d.f.</b> | <b>Mean Sq.</b> | <b>F</b> | <b>Prob&gt;F</b> |
| <b>Depth</b>                               | 0.651          | 2           | 0.3253          | 0.29     | 0.753            |
| <b>Location</b>                            | 0.189          | 2           | 0.09044         | 0.08     | 0.9238           |
| <b>Substrates</b>                          | 1.111          | 2           | 0.55525         | 0.49     | 0.6175           |
| <b>Error</b>                               | 50.125         | 44          | 1.1392          |          |                  |
| <b>Total</b>                               | 531734         | 50          |                 |          |                  |

Table 1S. C

Multifactor three-way ANOVA results to test the presence of significant differences in leaf length among samples collected at different depth, location and substrate typology.

| <b>Three-way ANOVA – Leaf length (cm)</b> |                |             |                 |          |                  |
|-------------------------------------------|----------------|-------------|-----------------|----------|------------------|
|                                           | <b>Sum Sq.</b> | <b>d.f.</b> | <b>Mean Sq.</b> | <b>F</b> | <b>Prob&gt;F</b> |
| <b>Depth</b>                              | 600.9          | 2           | 300.449         | 7.45     | <b>p&lt;0.01</b> |
| <b>Location</b>                           | 203.17         | 2           | 101.585         | 2.52     | 0.0922           |
| <b>Substrates</b>                         | 183.89         | 2           | 91.945          | 2.28     | 0.1144           |
| <b>Error</b>                              | 1775.59        | 44          | 40.354          |          |                  |
| <b>Total</b>                              | 2662.29        | 50          |                 |          |                  |

Table 1S. D

Multifactor three-way ANOVA results to test the presence of significant differences in leaf surface for shoot among samples collected at different depth, location and substrate typology

| <b>Three-way ANOVA – Leaf surface/shoot (cm<sup>2</sup>)</b> |                |             |                 |          |                  |
|--------------------------------------------------------------|----------------|-------------|-----------------|----------|------------------|
|                                                              | <b>Sum Sq.</b> | <b>d.f.</b> | <b>Mean Sq.</b> | <b>F</b> | <b>Prob&gt;F</b> |
| <b>Depth</b>                                                 | 17977.5        | 2           | 8988.76         | 5.47     | <b>p&lt;0.01</b> |
| <b>Location</b>                                              | 4709.4         | 2           | 2354.71         | 1.43     | 0.2493           |
| <b>Substrates</b>                                            | 6209           | 2           | 3104.51         | 1.89     | 0.163            |
| <b>Error</b>                                                 | 72248.3        | 44          | 1642.01         |          |                  |
| <b>Total</b>                                                 | 94563.4        | 50          |                 |          |                  |

Table 1S. E

Multifactor three-way ANOVA results to test the presence of significant differences in leaf surface for shoot among samples collected at different depth, location and substrate typology.

| <b>Three-way ANOVA – Leaf Area Index (LAI) (m<sup>2</sup>/m<sup>2</sup>)</b> |                |             |                 |          |                  |
|------------------------------------------------------------------------------|----------------|-------------|-----------------|----------|------------------|
|                                                                              | <b>Sum Sq.</b> | <b>d.f.</b> | <b>Mean Sq.</b> | <b>F</b> | <b>Prob&gt;F</b> |
| <b>Depth</b>                                                                 | 48.84          | 2           | 24.4202         | 6.67     | <b>p&lt;0.01</b> |
| <b>Location</b>                                                              | 6.69           | 2           | 3.3438          | 0.91     | 0.4086           |
| <b>Substrates</b>                                                            | 20.01          | 2           | 10.0047         | 2.73     | 0.0761           |
| <b>Error</b>                                                                 | 161.07         | 44          | 3.6607          |          |                  |
| <b>Total</b>                                                                 | 236.18         | 50          |                 |          |                  |
